# Supplementary material
Source: Springer Nature journal article supplement (https://www.springermedizin.de/resource/supplementary/12936_2013_2869_MOESM9_ESM.pdf/9544488)

**A**

Endothelial cells

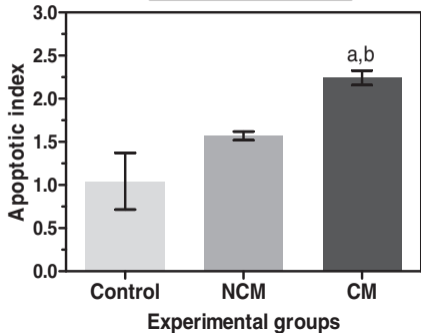**B**

Intravascular leukocytes

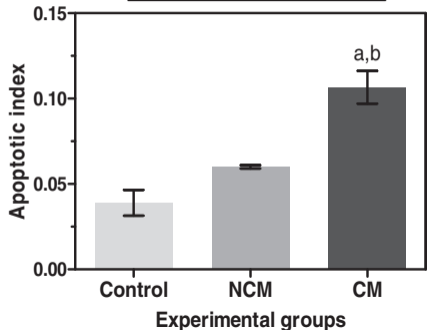

Supplement: MOESM9 [file 9544488]
